# Supplementary material for: Building retrofits and urban climate feedback trigger heating energy rebounds and inequity
Source: Research Square preprint supplement (doi:10.21203/rs.3.rs-7851015/v1), 2025-10-16
Supplement: Supplementary file 1 [file e0340ec46eb0d3f924789acb.pdf]

## Supplementary Information

### Building retrofits and urban climate feedback trigger heating energy rebounds and inequity

Yiqing Liu<sup>1,2</sup>, Sue Grimmond<sup>2\*</sup>, Zhiwen Luo<sup>3\*</sup>

<sup>1</sup> School of Built Environment, University of Reading, Reading, United Kingdom

<sup>2</sup> Department of Meteorology, University of Reading, Reading, United Kingdom

<sup>3</sup> Welsh School of Architecture, Cardiff University, Cardiff, United Kingdom

\*Correspondence: Prof Zhiwen Luo (luoz18@cardiff.ac.uk); Prof Sue Grimmond (c.s.grimmond@reading.ac.uk)

#### SI 1. $Q_{F,B}$ calculation and parametrisation

To calculate anthropogenic heat emission from building ( $Q_{F,B}$ ), each component of Eq. (1) is derived from heat flux difference between an 'occupied' ( $o$ ) and 'unoccupied' ( $uo$ ) state<sup>1</sup>. The 'uo' state represents a pre-occupation empty building, with the difference ( $\Delta=o-uo$ ) between the two states capturing heat fluxes resulting from human activities. This allows us to isolate the changed heat fluxes induced by human activities only.

Beyond the main formulation in Eq. (1), internal heat gains in the IECC (International Energy Conservation Code) archetypes are partitioned into radiant, sensible, latent, and lost fractions. The “lost” fraction does not impact the building's energy balance but accounts for within building energy use, indicating its heat emission should also be considered. As we assume all “lost” heat from most appliances (e.g. cooking ranges and miscellaneous equipment) is sensible heat exhausted via mechanical ventilation, its emissions are included in  $\Delta BAE$  (building air exchange in Eq. (1)). For gas clothes-dryers releasing humid waste air to outdoors, we assume 60% being sensible for inclusion in  $Q_{F,B}$ <sup>2</sup>. For washing machines and dishwashers, the heat is transferred to hot water, leaving the building volume via pipe network and is currently unaccounted for in  $Q_{F,B}$ .

In each city, the EnergyPlus determined daily mean  $Q_{F,B}$  is used to parameterise  $Q_{F,B}$  based on heating/cooling degree days (HDD/CDD) allowing some weather variability to be accounted for<sup>3,4</sup>:

$$Q_{F,B} = \rho_{pop} [a_{F0} + a_{F1}CDD + a_{F2}HDD] \quad (S1)$$

$$CDD = |T_a - T_{b,c}| \text{ when } T_a > T_{b,c} \quad (S2)$$

$$HDD = |T_{b,h} - T_a| \text{ when } T_a < T_{b,h} \quad (S3)$$

where  $\rho_{pop}$  is the population density and  $T_a$  is daily mean outdoor air temperature.  $a_{F0}$ ,  $a_{F1}$ ,  $a_{F2}$ , are coefficients reflecting the base value of  $Q_{F,B}$  and its sensitivity to CDD and HDD. Here, these coefficients and base temperatures for heating ( $T_{b,h}$ ) and cooling ( $T_{b,c}$ ) are determined from the EnergyPlus daily mean  $Q_{F,B}$  and urbanised the 2-m outdoor air temperature ( $T_a$ ) from TMY3.

The diurnal variations of  $Q_{F,B}$  affect outdoor energy exchanges, with timing important because of the growth and decay of the boundary layer<sup>5,6,7</sup> when large  $Q_{F,B}$  can be influenced by building operations (profiles corresponding to heating, cooling or ventilation)<sup>8</sup>. We give SUEWS three median diurnal profiles (hourly  $Q_{F,B}$  is normalised by daily mean  $Q_{F,B}$ ) that vary with outdoor air temperature (heating ( $T_a < T_{b,h}$ ), cooling ( $T_a > T_{b,c}$ ) and ventilation ( $T_{b,c} > T_a > T_{b,h}$ ) in Table S1-S2) to more accurately reflect the temporal dynamics of  $Q_{F,B}$ .

Table S1 Neighbourhood scale  $Q_{F,B}$  coefficients for Eq. S1- S3 determined from EnergyPlus daily mean results for before retrofitting (BR) scenarios, assuming all buildings are base case (BC) building.

| Climate zone | T <sub>b,h</sub> [°C] | T <sub>b,c</sub> [°C] | $a_{F0}$<br>[W m <sup>-2</sup> (Cap ha <sup>-1</sup> ) <sup>-1</sup> ] | $a_{F1}$<br>[W m <sup>-2</sup> K <sup>-1</sup> (Cap ha <sup>-1</sup> ) <sup>-1</sup> ] | $a_{F2}$<br>[W m <sup>-2</sup> K <sup>-1</sup> (Cap ha <sup>-1</sup> ) <sup>-1</sup> ] |
|--------------|-----------------------|-----------------------|------------------------------------------------------------------------|----------------------------------------------------------------------------------------|----------------------------------------------------------------------------------------|
| 1A           | 22.0                  | 24.0                  | 0.0776                                                                 | 0.0065                                                                                 | 0.0090                                                                                 |
| 2A           | 21.1                  | 24.0                  | 0.0839                                                                 | 0.0044                                                                                 | 0.0117                                                                                 |
| 2B           | 21.6                  | 24.0                  | 0.1054                                                                 | 0.0038                                                                                 | 0.0092                                                                                 |
| 3A           | 17.5                  | 24.0                  | 0.1022                                                                 | 0.0025                                                                                 | 0.0215                                                                                 |
| 3B           | 19.3                  | 24.0                  | 0.1032                                                                 | 0.0043                                                                                 | 0.0136                                                                                 |
| 3C           | 18.5                  | 21.3                  | 0.1022                                                                 | 0.0082                                                                                 | 0.0124                                                                                 |
| 4A           | 15.8                  | 24.0                  | 0.1004                                                                 | 0.0041                                                                                 | 0.0297                                                                                 |
| 4B           | 16.5                  | 24.0                  | 0.1130                                                                 | 0.0034                                                                                 | 0.0177                                                                                 |
| 4C           | 14.9                  | 16.0                  | 0.1355                                                                 | 0.0000                                                                                 | 0.0256                                                                                 |
| 5A           | 15.2                  | 24.0                  | 0.1181                                                                 | 0.0000                                                                                 | 0.0312                                                                                 |
| 5B           | 16.5                  | 22.5                  | 0.1206                                                                 | 0.0058                                                                                 | 0.0206                                                                                 |
| 5C           | 12.6                  | 16.0                  | 0.1510                                                                 | 0.0012                                                                                 | 0.0255                                                                                 |
| 6A           | 14.2                  | 21.8                  | 0.0983                                                                 | 0.0046                                                                                 | 0.0243                                                                                 |
| 6B           | 15.3                  | 24.0                  | 0.1395                                                                 | 0.0031                                                                                 | 0.0247                                                                                 |
| 7            | 12.0                  | 22.0                  | 0.0960                                                                 | 0.0061                                                                                 | 0.0216                                                                                 |
| 8            | 12.0                  | 12.0                  | 0.0769                                                                 | 0.0036                                                                                 | 0.0225                                                                                 |

Table S2 As Table S2, but for after retrofitting (AR) scenario varied by 4 retrofit adoption rate ( $n_{\text{retrofit}}$ =25%, 50%, 75% and 95%).

| Climate zone               | T <sub>b,h</sub> [°C] | T <sub>b,c</sub> [°C] | $a_{F0}$<br>[W m <sup>-2</sup> (Cap ha <sup>-1</sup> ) <sup>-1</sup> ] | $a_{F1}$<br>[W m <sup>-2</sup> K <sup>-1</sup> (Cap ha <sup>-1</sup> ) <sup>-1</sup> ] | $a_{F2}$<br>[W m <sup>-2</sup> K <sup>-1</sup> (Cap ha <sup>-1</sup> ) <sup>-1</sup> ] |
|----------------------------|-----------------------|-----------------------|------------------------------------------------------------------------|----------------------------------------------------------------------------------------|----------------------------------------------------------------------------------------|
| $n_{\text{retrofit}}$ =25% |                       |                       |                                                                        |                                                                                        |                                                                                        |
| 1A                         | 21.9                  | 24.0                  | 0.0706                                                                 | 0.0062                                                                                 | 0.0071                                                                                 |
| 2A                         | 19.5                  | 24.0                  | 0.0808                                                                 | 0.0032                                                                                 | 0.0107                                                                                 |
| 2B                         | 21.4                  | 24.0                  | 0.0940                                                                 | 0.0038                                                                                 | 0.0075                                                                                 |
| 3A                         | 17.1                  | 24.0                  | 0.0909                                                                 | 0.0031                                                                                 | 0.0175                                                                                 |
| 3B                         | 18.6                  | 24.0                  | 0.0931                                                                 | 0.0041                                                                                 | 0.0111                                                                                 |
| 3C                         | 18.3                  | 21.0                  | 0.0898                                                                 | 0.0068                                                                                 | 0.0098                                                                                 |
| 4A                         | 15.5                  | 24.0                  | 0.0896                                                                 | 0.0048                                                                                 | 0.0239                                                                                 |
| 4B                         | 16.0                  | 24.0                  | 0.1004                                                                 | 0.0041                                                                                 | 0.0143                                                                                 |
| 4C                         | 14.8                  | 14.2                  | 0.1154                                                                 | 0.0003                                                                                 | 0.0208                                                                                 |
| 5A                         | 15.0                  | 24.0                  | 0.1032                                                                 | 0.0002                                                                                 | 0.0253                                                                                 |
| 5B                         | 16.0                  | 22.5                  | 0.1075                                                                 | 0.0052                                                                                 | 0.0167                                                                                 |
| 5C                         | 12.5                  | 16.0                  | 0.1274                                                                 | 0.0021                                                                                 | 0.0209                                                                                 |
| 6A                         | 14.1                  | 21.3                  | 0.0880                                                                 | 0.0044                                                                                 | 0.0202                                                                                 |
| 6B                         | 15.1                  | 24.0                  | 0.1212                                                                 | 0.0049                                                                                 | 0.0200                                                                                 |
| 7                          | 12.0                  | 21.6                  | 0.0859                                                                 | 0.0060                                                                                 | 0.0179                                                                                 |
| 8                          | 12.0                  | 12.0                  | 0.0686                                                                 | 0.0036                                                                                 | 0.0187                                                                                 |
| $n_{\text{retrofit}}$ =50% |                       |                       |                                                                        |                                                                                        |                                                                                        |
| 1A                         | 20.8                  | 24.0                  | 0.0644                                                                 | 0.0056                                                                                 | 0.0061                                                                                 |
| 2A                         | 18.9                  | 24.0                  | 0.0724                                                                 | 0.0034                                                                                 | 0.0088                                                                                 |
| 2B                         | 20.8                  | 24.0                  | 0.0829                                                                 | 0.0038                                                                                 | 0.0060                                                                                 |

|                            |      |      |        |        |        |
|----------------------------|------|------|--------|--------|--------|
| 3A                         | 16.7 | 24.0 | 0.0786 | 0.0040 | 0.0135 |
| 3B                         | 17.8 | 24.0 | 0.0816 | 0.0041 | 0.0085 |
| 3C                         | 17.6 | 21.0 | 0.0782 | 0.0059 | 0.0074 |
| 4A                         | 15.1 | 24.0 | 0.0789 | 0.0054 | 0.0182 |
| 4B                         | 14.9 | 24.0 | 0.0880 | 0.0048 | 0.0110 |
| 4C                         | 14.6 | 15.7 | 0.0941 | 0.0015 | 0.0161 |
| 5A                         | 14.7 | 23.8 | 0.0888 | 0.0019 | 0.0194 |
| 5B                         | 15.6 | 22.4 | 0.0918 | 0.0052 | 0.0127 |
| 5C                         | 12.4 | 16.0 | 0.1036 | 0.0031 | 0.0162 |
| 6A                         | 14.0 | 20.9 | 0.0777 | 0.0046 | 0.0161 |
| 6B                         | 14.7 | 23.9 | 0.1025 | 0.0065 | 0.0154 |
| 7                          | 12.0 | 21.6 | 0.0754 | 0.0067 | 0.0141 |
| 8                          | 12.0 | 12.0 | 0.0603 | 0.0036 | 0.0149 |
| n <sub>retrofit</sub> =75% |      |      |        |        |        |
| 1A                         | 20.8 | 24.0 | 0.0644 | 0.0056 | 0.0061 |
| 2A                         | 18.9 | 24.0 | 0.0724 | 0.0034 | 0.0088 |
| 2B                         | 20.8 | 24.0 | 0.0829 | 0.0038 | 0.0060 |
| 3A                         | 16.7 | 24.0 | 0.0786 | 0.0040 | 0.0135 |
| 3B                         | 17.8 | 24.0 | 0.0816 | 0.0041 | 0.0085 |
| 3C                         | 17.6 | 21.0 | 0.0782 | 0.0059 | 0.0074 |
| 4A                         | 15.1 | 24.0 | 0.0789 | 0.0054 | 0.0182 |
| 4B                         | 14.9 | 24.0 | 0.0880 | 0.0048 | 0.0110 |
| 4C                         | 14.6 | 15.7 | 0.0941 | 0.0015 | 0.0161 |
| 5A                         | 14.7 | 23.8 | 0.0888 | 0.0019 | 0.0194 |
| 5B                         | 15.6 | 22.4 | 0.0918 | 0.0052 | 0.0127 |
| 5C                         | 12.4 | 16.0 | 0.1036 | 0.0031 | 0.0162 |
| 6A                         | 14.0 | 20.9 | 0.0777 | 0.0046 | 0.0161 |
| 6B                         | 14.7 | 23.9 | 0.1025 | 0.0065 | 0.0154 |
| 7                          | 12.0 | 21.6 | 0.0754 | 0.0067 | 0.0141 |
| 8                          | 12.0 | 12.0 | 0.0603 | 0.0036 | 0.0149 |
| n <sub>retrofit</sub> =95% |      |      |        |        |        |
| 1A                         | 18.8 | 24.0 | 0.0507 | 0.0052 | 0.0030 |
| 2A                         | 17.4 | 24.0 | 0.0546 | 0.0045 | 0.0048 |
| 2B                         | 18.3 | 24.0 | 0.0617 | 0.0039 | 0.0032 |
| 3A                         | 14.3 | 22.3 | 0.0540 | 0.0041 | 0.0063 |
| 3B                         | 14.9 | 21.6 | 0.0547 | 0.0036 | 0.0037 |
| 3C                         | 14.2 | 19.9 | 0.0525 | 0.0041 | 0.0037 |
| 4A                         | 13.0 | 20.9 | 0.0538 | 0.0041 | 0.0078 |
| 4B                         | 12.0 | 18.6 | 0.0556 | 0.0032 | 0.0047 |
| 4C                         | 14.0 | 15.2 | 0.0534 | 0.0033 | 0.0074 |
| 5A                         | 13.0 | 21.1 | 0.0595 | 0.0036 | 0.0087 |
| 5B                         | 12.8 | 21.6 | 0.0628 | 0.0044 | 0.0054 |
| 5C                         | 12.0 | 14.4 | 0.0578 | 0.0034 | 0.0077 |
| 6A                         | 13.0 | 19.7 | 0.0588 | 0.0041 | 0.0085 |
| 6B                         | 13.6 | 17.2 | 0.0623 | 0.0029 | 0.0069 |
| 7                          | 12.0 | 15.5 | 0.0526 | 0.0027 | 0.0073 |
| 8                          | 12.0 | 12.0 | 0.0450 | 0.0037 | 0.0079 |

45  
46  
47  
48  
49  
50  
51

Table S3 Thermal properties used from dominant probability for single family detached house constructed before 1980 in RESSTOCK (Wilson et al., 2017; Reyna et al., 2022).

| City                      | R <sub>wall</sub><br>(°F·ft <sup>2</sup> ·h<br>BTU <sup>-1</sup> ) | R <sub>ceiling</sub><br>(°F·ft <sup>2</sup> ·h<br>BTU <sup>-1</sup> ) | Window type                   | Window U-<br>value<br>(W m <sup>-2</sup> K <sup>-1</sup> ) | SHGC | Infiltration<br>(ACH at<br>50Pa) |
|---------------------------|--------------------------------------------------------------------|-----------------------------------------------------------------------|-------------------------------|------------------------------------------------------------|------|----------------------------------|
| 1A Miami, FL              | 0                                                                  | 13                                                                    | Single, Clear, Metal          | 6.59                                                       | 0.76 | 20                               |
| 2A Tampa, FL              | 0                                                                  | 13                                                                    | Single, Clear, Non-metal      | 4.77                                                       | 0.63 | 20                               |
| 2B Tucson, AZ             | 0                                                                  | 13                                                                    | Single, Clear, Non-metal      | 4.77                                                       | 0.63 | 15                               |
| 3A Atlanta, GA            | 0                                                                  | 13                                                                    | Single, Clear, Non-metal      | 4.77                                                       | 0.63 | 15                               |
| 3B El Paso, TX            | 0                                                                  | 13                                                                    | Single, Clear, Non-metal      | 4.77                                                       | 0.63 | 15                               |
| 3C San Diego, CA          | 0                                                                  | 13                                                                    | Single, Clear, Non-metal      | 4.77                                                       | 0.63 | 15                               |
| 4A New York, NY           | 0                                                                  | 19                                                                    | Single, Clear, Non-metal      | 4.77                                                       | 0.63 | 15                               |
| 4B Albuquerque, NM        | 0                                                                  | 13                                                                    | Single, Clear, Non-metal      | 4.77                                                       | 0.63 | 15                               |
| 4C Seattle, WA            | 0                                                                  | 19                                                                    | Single, Clear, Non-metal      | 4.77                                                       | 0.63 | 15                               |
| 5A Buffalo, NY            | 0                                                                  | 19                                                                    | Single, Clear, Non-metal      | 4.77                                                       | 0.63 | 15                               |
| 5B Denver, CO             | 0                                                                  | 19                                                                    | Single, Clear, Non-metal      | 4.77                                                       | 0.63 | 15                               |
| 5C Port Angeles, WA       | 0                                                                  | 19                                                                    | Single, Clear, Non-metal      | 4.77                                                       | 0.63 | 15                               |
| 6A Rochester, MN          | 11                                                                 | 49                                                                    | Single, Clear, Non-metal      | 4.77                                                       | 0.63 | 15                               |
| 6B Great Falls, MT        | 0                                                                  | 19                                                                    | Double, Clear, Non-metal, Air | 2.78                                                       | 0.56 | 15                               |
| 7 International Falls, MN | 11                                                                 | 49                                                                    | Double, Clear, Non-metal, Air | 2.78                                                       | 0.56 | 15                               |
| 8 Fairbanks, AK           | 11                                                                 | 49                                                                    | Double, Clear, Non-metal, Air | 2.78                                                       | 0.56 | 15                               |

## SI 2. $\Delta Q_s$ calculation and parametrisation

The net change in stored energy within the building volume ( $\Delta Q_s$ ) is calculated as the sum of two EnergyPlus outputs: *Surface Heat Storage Rate* and *Zone Air Heat Balance Air Energy Storage Rate*.

The EnergyPlus-derived  $\Delta Q_s$ , together with  $Q_{F,B}$ , are used to determine neighbourhood scale parameters prior to neighbourhood simulations.

Neighbourhood-scale storage heat flux is estimated using the Objective Hysteresis Model (OHM)<sup>11</sup>

$$\Delta Q_s = \sum_i f_i \left[ a_{1i} Q^* + a_{2i} \frac{\partial Q^*}{\partial t} + a_{3i} \right] \quad (S4)$$

where  $f$  is the surface cover fraction for each surface type (seven per model grid-cell: paved, buildings, evergreen trees/shrubs, deciduous trees/shrubs, grass, bare soil and water), and three OHM coefficients ( $a_1$ ,  $a_2$ , and  $a_3$ ) determined from model simulations<sup>12,13</sup> or from observations<sup>14,15</sup>. These coefficients indicate the general proportional of  $Q^*$  that goes into  $\Delta Q_s$  ( $a_1$ ), degree of diurnal hysteresis between  $\Delta Q_s$  and  $Q^*$  ( $a_2$ ) and the size of the flux when  $Q^*$  is 0 W m<sup>-2</sup> ( $a_3$ ). The OHM coefficients are determined also from the initial EnergyPlus simulations. As the daily coefficients are highly influenced by wind speed at building height ( $U_{zh}$ ) and incoming shortwave radiation ( $K_d$ ), we parameterise  $a_1$ ,  $a_2$ ,  $a_3$  as linear functions of  $U_{zh}$  and  $K_d$  to capture the weather variability.

## SI 3. SUEWS simulation iteration

Surface Urban Energy and Water Balance Scheme (SUEWS) is a neighbourhood or local-scale land surface model for simulating the surface energy fluxes<sup>16</sup> and vertical meteorological profiles<sup>17,18,19</sup>, such as air temperature, wind speed, and relative humidity, within the roughness. The model has been extensively evaluated in many urban environments globally<sup>16,17,18,19,20</sup>. SUEWS allows rapid computation of the impacts of varying urban characteristics, such as land cover<sup>21</sup>, neighbourhood

morphology<sup>22</sup>, population increases<sup>23</sup> and building HVAC systems<sup>24</sup>. Therefore, we select this model to assess neighbourhood climate and impacts of building energy retrofiting.

The neighbourhood scale surface energy balance is written as<sup>25</sup>:

$$Q^* + Q_F = Q_H + Q_E + \Delta Q_S \quad (S5)$$

where  $Q^*$  is the net all-wave radiation,  $Q_F$  is the total anthropogenic heat flux,  $Q_H$  is the turbulent sensible heat flux,  $Q_E$  is the latent heat flux and  $\Delta Q_S$  is the net storage heat flux. As SUEWS calculates  $Q_H$  as the residual in Eq. S5, the net changes from the other fluxes impact  $Q_H$ , consistent with observations<sup>26</sup>.

The air temperature (T), humidity (q) and wind speed (U) at different heights (z) within urban canopy layer are expressed as<sup>18, 19</sup>:

$$T(z) = T(z_h) - \frac{Q_H}{u^* \rho c_p} \frac{P_r}{\beta f} \left[ 1 - e^{\left( \frac{\beta f (z - z_h)}{l_M} \right)} \right] \quad (S6)$$

$$q(z) = q(z_h) - \frac{Q_E}{u^* \rho L_v} \frac{P_r}{\beta f} \left[ 1 - e^{\left( \frac{\beta f (z - z_h)}{l_M} \right)} \right] \quad (S7)$$

$$U(z) = U(z_h) e^{\left( \frac{\beta (z - z_h)}{l_M} \right)} \quad (S8)$$

where  $z_h$  is urban canopy layer height assumed here to be mean building height,  $u^*$  friction velocity,  $\rho$  density of air,  $c_p$  the specific heat of air at constant pressure,  $P_r$  the Prandtl number, and  $l_M$  the mixing length.  $\beta$  and  $f$  are the Harman and Finnigan (2007) parameters,  $L_v$  the latent heat of vaporisation.

After determining the coefficients for both  $Q_{F,B}$  and  $\Delta Q_S$  (Section SI.1 and SI.2), SUEWS is run iteratively until 2 m air temperature converges ( $<0.01$  °C; Fig. S1). An initial  $Q_{F,B}$  is obtained by calculating HDD and CDD from initial forcing air temperature  $T_{forcing}$  in SUEWS, producing an updated air temperature  $T_2$ . This  $T_2$  is used to calculate the new  $Q_{F,B}$ . Initial OHM coefficients (derived from statistical regression for one-year hourly  $\Delta Q_S$  and  $Q^*$ , SI 2) are used to calculate  $\Delta Q_S$ , with wind speed at building height ( $U_{zh}$ ) used to update OHM coefficients and  $\Delta Q_S$  iteratively. Convergence is typically achieved within three iterations.

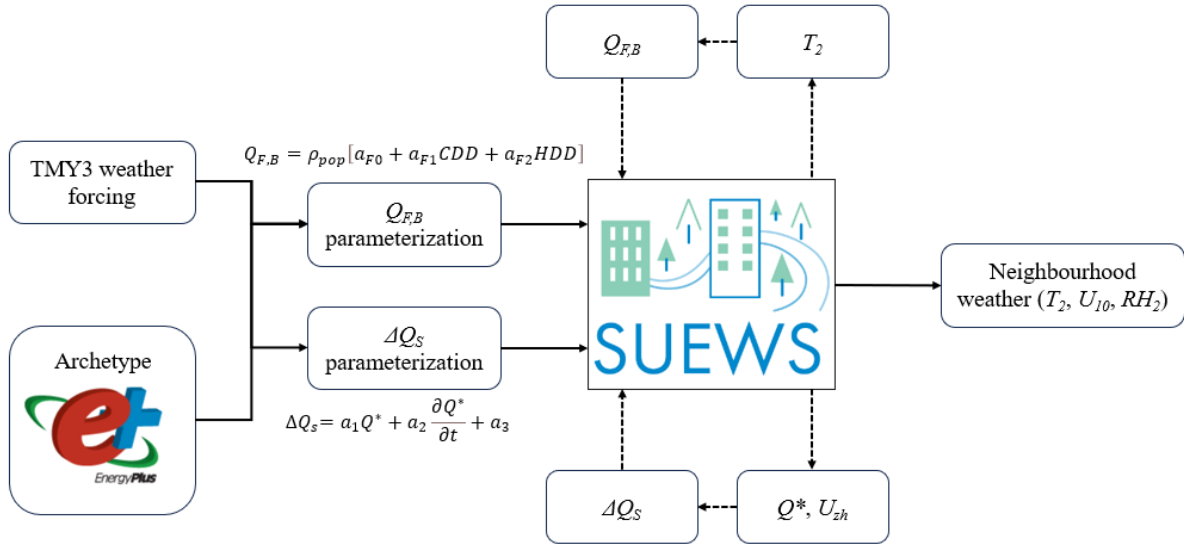

Fig. S1: Workflow of determining SUEWS model parameters for  $\Delta Q_s$  and  $Q_{F,B}$  and simulations. Internal SUEWS iteration processes (dashed) update  $\Delta Q_s$  and  $Q_{F,B}$ .

Table S4 Longitude and latitude for the ERA5 grid used as climate forcing in SUEWS.

| City                      | Longitude (W °) | Latitude (N°) |
|---------------------------|-----------------|---------------|
| 1A Miami, FL              | 80.25           | 25.875        |
| 2A Tampa, FL              | 82.5            | 27.875        |
| 2B Tucson, AZ             | 111.0           | 32.25         |
| 3A Atlanta, GA            | 84.375          | 33.75         |
| 3B El Paso, TX            | 106.375         | 31.75         |
| 3C San Diego, CA          | 117.125         | 32.75         |
| 4A New York, NY           | 73.75           | 40.625        |
| 4B Albuquerque, NM        | 106.75          | 35.0          |
| 4C Seattle, WA            | 122.75          | 47.625        |
| 5A Buffalo, NY            | 78.875          | 42.875        |
| 5B Denver, CO             | 105.0           | 39.75         |
| 5C Port Angeles, WA       | 123.375         | 48.125        |
| 6A Rochester, MN          | 92.5            | 44.0          |
| 6B Great Falls, MT        | 111.375         | 47.5          |
| 7 International Falls, MN | 93.375          | 48.625        |
| 8 Fairbanks, AK           | 147.475         | 64.75         |

#### SI 4. Change of heat flux from energy retrofit

Building energy retrofitting changes the wintertime neighbourhood anthropogenic ( $Q_{F,B}$ ), storage ( $\Delta Q_s$ ) and turbulent sensible heat fluxes ( $Q_H$ ) in different ways (Fig. 3). For the medium density scenario with 95% retrofit adoption rate, all cities has larger change in  $Q_{F,B}$  than  $\Delta Q_s$ . Their net effect impacts  $Q_H$  and therefore outdoor air temperature. The change in  $Q_{F,B}$  has a clear diurnal pattern in most cities, with nocturnal reduction being more pronounced, most notably in colder regions such as Great Falls, International Falls and Fairbanks. Whereas, warmer cities with little need for heating (e.g. Miami and Tampa) have a negligible reduction in  $Q_{F,B}$ . This negative correlation between daily reduced  $Q_{F,B}$  and  $T_{forcing}$  holds generally (Fig. 4) as cities in the colder regions have higher initial heating demands, and those in warmer areas have smaller changes.

The relatively small change in  $\Delta Q_S$  (Fig. S2) is attributed to the very lightweight envelope used in IECC archetype (wood-frame wall). Such lightweight material has limited capacity for heat absorption and release, constraining the magnitude of  $\Delta Q_S$ . The energy retrofitting measures, such as enhanced insulation and lower windows solar heat gain coefficient (SHGC), further reduce daytime solar radiation driven gains (negative change from 09:00 to 15:00, Fig. S2), and therefore reducing heat release at night. It indicates for lightweight buildings, retrofitting primarily influences urban climate through changes in  $Q_{F,B}$ , rather than through modifications in building heat storage.

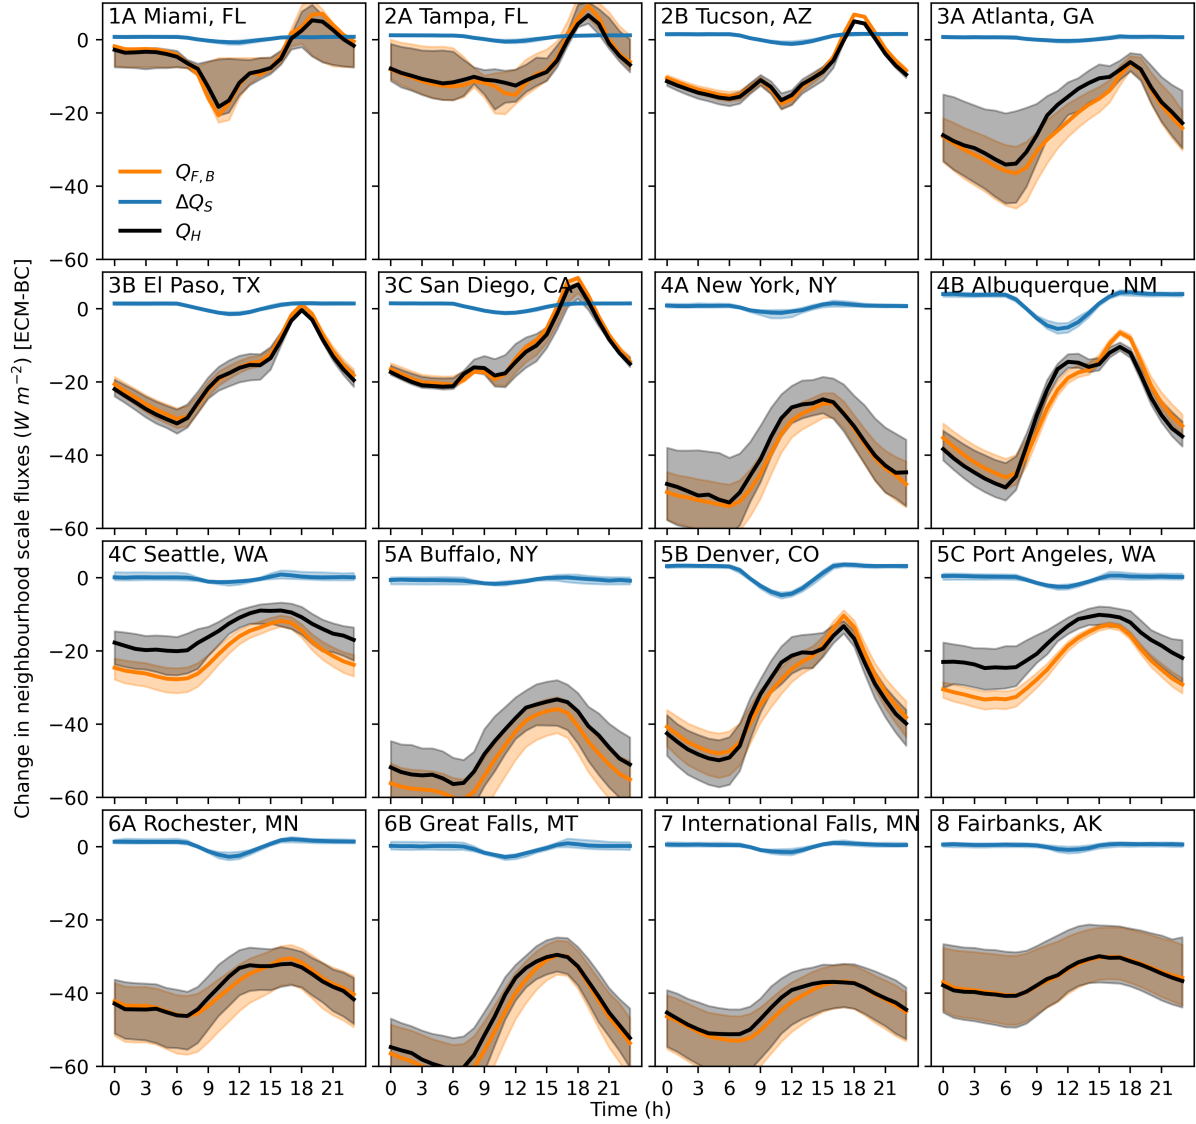

Fig. S2: Change in neighbourhood scale (with building plan area fraction of  $\lambda_p=0.3$ ), wintertime (December, January, and February: DJF) anthropogenic ( $Q_{F,B}$ ), storage ( $\Delta Q_S$ ) and turbulent sensible heat fluxes ( $Q_H$ ) from retrofitting buildings ( $n_{\text{retrofit}}=95\%$ ) in 16 USA cities showing median (line) and interquartile range (IQR, shading). Note change in  $Q_H$  results from the combined effect of changes in  $Q_{F,B}$  and  $\Delta Q_S$ .

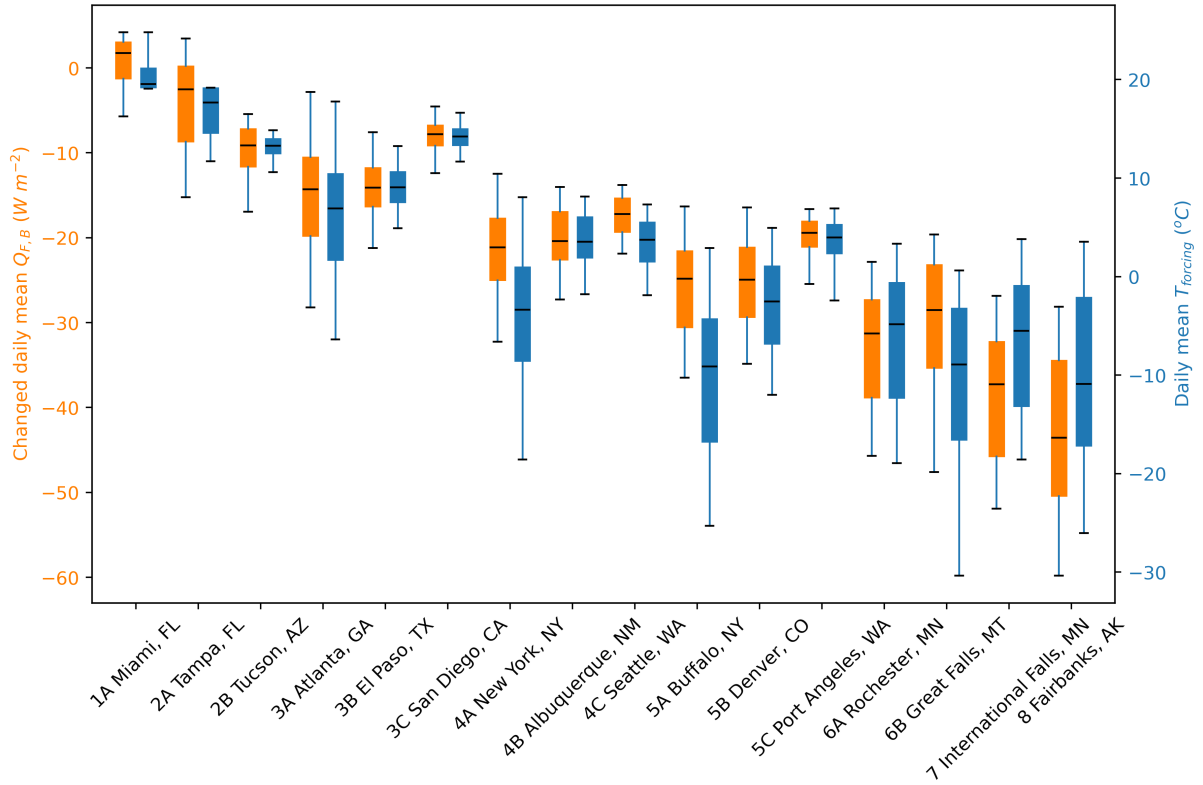

Fig.S3: Variability (median line), IQR (box) and 5th–95th percentiles (whiskers) in changes [after retrofit differ to before retrofit] of the DJF daily mean neighbourhood scale ( $\lambda_p=0.3$ ,  $n_{\text{retrofit}}=95\%$ ) anthropogenic heat flux ( $Q_{F,B}$ , orange) and forcing height (33.5 m from ERA5<sup>28</sup>) air temperature ( $T_{\text{forcing}}$ , blue).

## SI 5. Bias of vertical wind profiles from SUEWS to EnergyPlus

SUEWS provides high-resolution wind speed profiles for each neighbourhood scenarios defined in (Fig. S4) but are neither directly imported nor directly compatible with EnergyPlus' use of a power-law with one set of parameters and 10-m wind speed data<sup>18</sup>. Hence, the vertical profiles of wind speed differ substantially (Fig. S4).



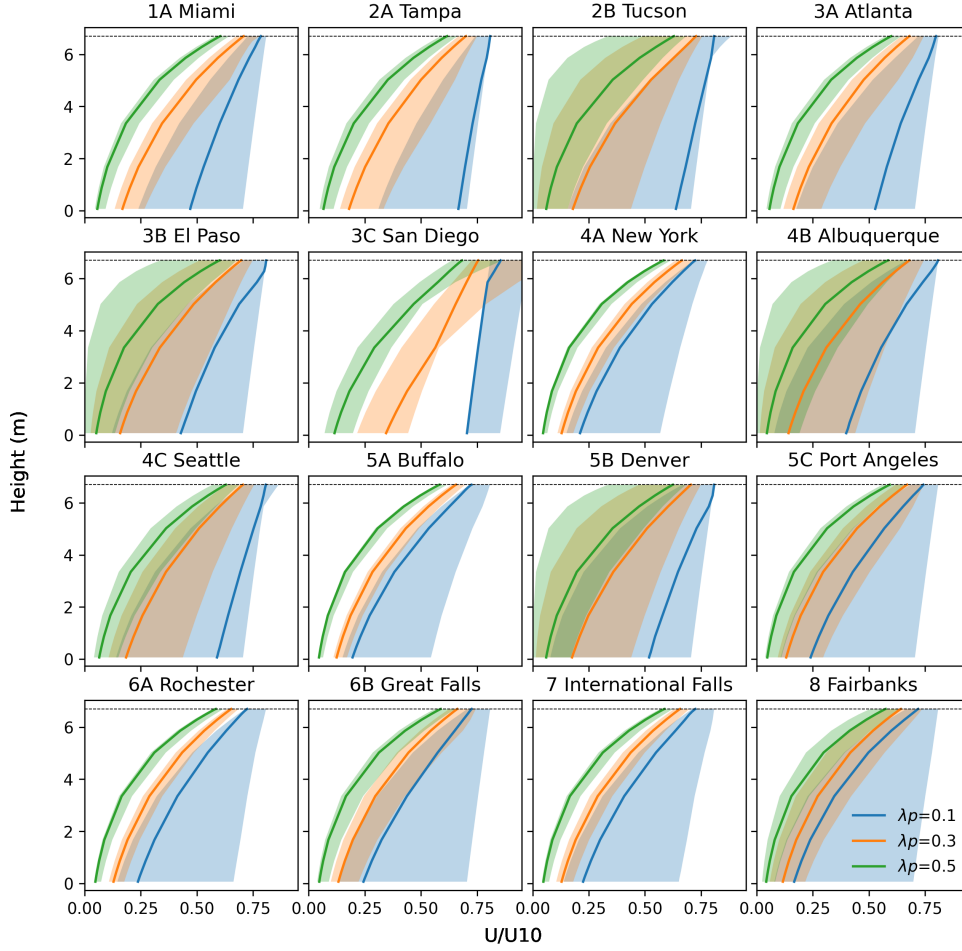

Fig. S4: Canopy layer vertical wind speed profiles (normalised by 10-m wind speed) with height ( $z$ ) across 16 US cities showing median (line) and interquartile range (IQR, shading). Mean building height is 6.7m.

In EnergyPlus, wind speed ( $U_z$ ) at height above ground  $z$  is estimated using<sup>29</sup>:

$$U_z = U_{met} \left[ \frac{\delta_{met}}{z_{met}} \right]^{\alpha_{met}} \left[ \frac{z}{\delta} \right]^{\alpha} \quad (\text{S9})$$

using a site exponent ( $\alpha$ ),  $\delta$  wind speed profile boundary layer thickness at the site; and meteorological data ( $met$ , default height  $z_{met} = 10$  m) with a corresponding wind speed profile exponent (default  $\alpha_{met} = 0.14$ ) and boundary layer thickness (default  $\delta_{met} = 270$  m). However, even using fitted values of  $\delta$  and  $\alpha$  (Tang et al. 2021), the vertical profile shape is biased (Fig. S5). To address this issue, we modify the EnergyPlus source code (Eq. S9) to a form that better matches the SUEWS profiles:

$$U_z = U_{met} \left( \frac{z}{z_{met}}^{\alpha} + \beta \right) \quad (\text{S10})$$

Using this form allows the wind speed bias at different heights to be improved, cf. using the default (Fig. S5), but bias remains because the profile coefficients (e.g.  $\alpha$ ,  $\beta$ ) are fixed per simulation year. This static approach does not capture variability in atmospheric stability or weather conditions affecting wind profile shape.

Future work should make the coupling dynamic to provide time-varying wind profiles directly from SUEWS to EnergyPlus. This would eliminate the need to parameterise wind profiles and substantially improve the representation of wind-driven processes, particularly infiltration and convective heat transfer, in building energy simulations.

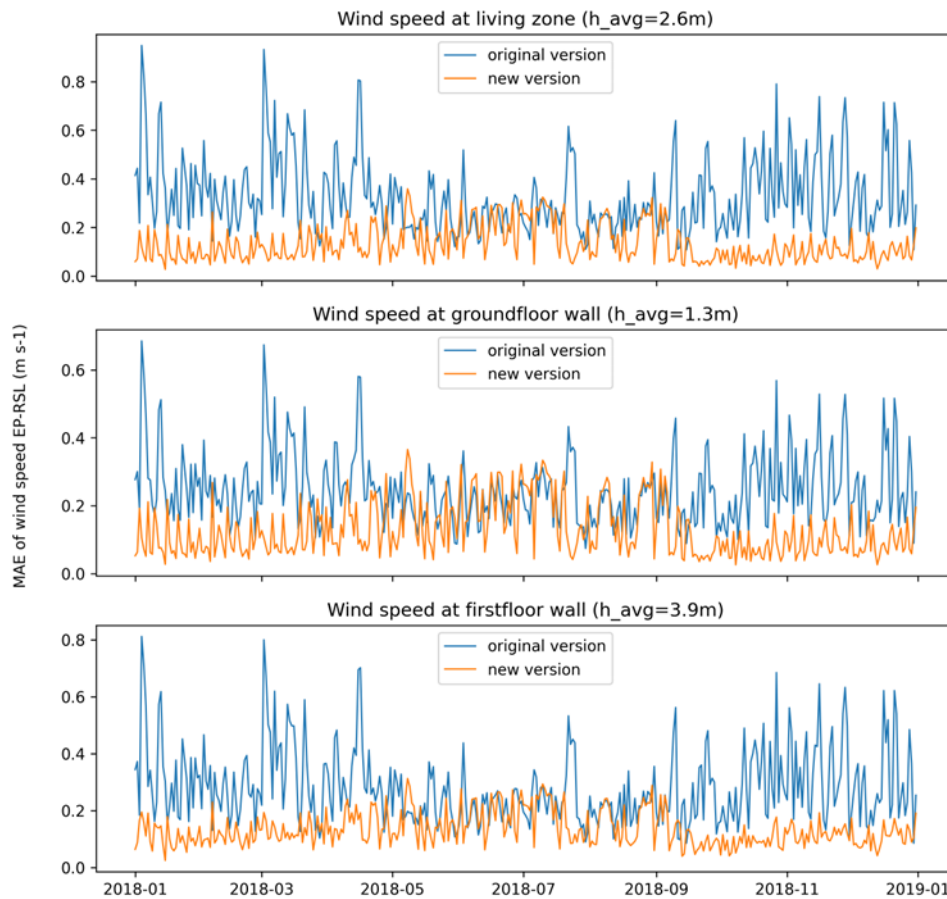

Fig. S5: Wind speed bias (EnergyPlus - SUEWS) for New York ( $\lambda_p=0.3$ , BC) when using Eq.S9 (blue) and Eq. S10 (orange).

## References

1. Liu, Y., Luo, Z. & Grimmond, S. Revising the definition of anthropogenic heat flux from buildings: role of human activities and building storage heat flux. *Atmos. Chem. Phys.* **22**, 4721–4735 (2022).
2. El Fil, B. & Garimella, S. Waste heat recovery in commercial gas-fired tumble dryers. *Energy* **218**, 119407 (2021).
3. Sailor, D. J. & Vasireddy, C. Correcting aggregate energy consumption data to account for variability in local weather. *Environ. Model. Softw.* **21**, 733–738 (2006).
4. Ao, X. *et al.* Evaluation of the Surface Urban Energy and Water Balance Scheme (SUEWS) at a dense urban site in Shanghai: Sensitivity to anthropogenic heat and irrigation. *J. Hydrometeorol.* **19**, 1983–2005 (2018).

- 167 5. Kotthaus, S. & Grimmond, C. S. B. Atmospheric boundary-layer characteristics from  
168 ceilometer measurements. Part 2: Application to London's urban boundary layer. *Q. J. R.*  
169 *Meteorol. Soc.* **144**, 1511–1524 (2018).
- 170 6. Glazer, R. H. *et al.* Hectometric-scale modelling of the urban mixed layer evaluated with a  
171 dense LiDAR-ceilometer network. *EGUsphere* 1–26 (2025).
- 172 7. Kotthaus, S. & Grimmond, C. S. B. Atmospheric boundary-layer characteristics from  
173 ceilometer measurements. Part 1: A new method to track mixed layer height and classify  
174 clouds. *Q. J. R. Meteorol. Soc.* **144**, 1525–1538 (2018).
- 175 8. Liu, Y., Luo, Z. & Grimmond, S. Impact of building envelope design parameters on diurnal  
176 building anthropogenic heat emission. *Build. Environ.* **234**, 110134 (2023).
- 177 9. Wilson, E. J., Christensen, C. B., Horowitz, S. G., Robertson, J. J. & Maguire, J. B. *Energy*  
178 *Efficiency Potential in the US Single-Family Housing Stock*. (2017).
- 179 10. Reyna, J. *et al.* *US Building Stock Characterization Study: A National Typology for*  
180 *Decarbonizing Us Buildings*. (2022).
- 181 11. Grimmond, C. S. B., Cleugh, H. A. & Oke, T. R. An objective urban heat storage model and its  
182 comparison with other schemes. *Atmos. Environ. Part B, Urban Atmos.* **25**, 311–326 (1991).
- 183 12. Arnfield, A. & Grimmond, C. An urban canyon energy budget model and its application to  
184 urban storage. *Energy Build.* **27**, 61–68 (1998).
- 185 13. Meyn, S. K. & Oke, T. R. Heat fluxes through roofs and their relevance to estimates of urban  
186 heat storage. *Energy Build.* **41**, 745–752 (2009).
- 187 14. Anandakumar, K. A study on the partition of net radiation into heat fluxes on a dry asphalt  
188 surface. *Atmos. Environ.* **33**, 3911–3918 (1999).
- 189 15. Ward, H. C., Kotthaus, S., Järvi, L. & Grimmond, C. S. B. Surface Urban Energy and Water  
190 Balance Scheme (SUEWS): Development and evaluation at two UK sites. *Urban Clim.* **18**, 1–  
191 32 (2016).
- 192 16. Järvi, L., Grimmond, C. S. B. & Christen, A. The Surface Urban Energy and Water Balance  
193 Scheme (SUEWS): Evaluation in Los Angeles and Vancouver. *J. Hydrol.* **411**, 219–237  
194 (2011).
- 195 17. Theeuwes, N. E., Ronda, R. J., Harman, I. N., Christen, A. & Grimmond, C. S. B.  
196 Parametrizing Horizontally-Averaged Wind and Temperature Profiles in the Urban Roughness  
197 Sublayer. *Boundary-Layer Meteorol.* **173**, 321–348 (2019).
- 198 18. Tang, Y. *et al.* Urban meteorological forcing data for building energy simulations. *Build.*  
199 *Environ.* **204**, 108088 (2021).
- 200 19. Lavor, V., Luo, Z. & Grimmond, S. Mapping Urban Airborne Infection Risk in Greater  
201 London, UK: Influence of urban form, weather, and population density (2025), (to be  
202 published).
- 203 20. Hang, J. *et al.* Evaluation of surface urban energy and water balance scheme (SUEWS) using

- scaled 2D model experiments under various seasons and sky conditions. *Urban Clim.* **54**, 101851 (2024).
21. Obe, O. B., Morakinyo, T. E. & Mills, G. A study of the impact of landscape heterogeneity on surface energy fluxes in a tropical climate using SUEWS. *Urban Clim.* **53**, 101788 (2024).
  22. Xie, X., Luo, Z., Grimmond, S. & Sun, T. Impact of building density on natural ventilation potential and cooling energy saving across Chinese climate zones. *Build. Environ.* **244**, 110621 (2023).
  23. Ward, H. C. & Grimmond, C. S. B. Assessing the impact of changes in surface cover, human behaviour and climate on energy partitioning across Greater London. *Landsc. Urban Plan.* **165**, 142–161 (2017).
  24. Xie, X. *et al.* Could residential air-source heat pumps exacerbate outdoor summer overheating and winter overcooling in UK 2050s climate scenarios? *Sustain. Cities Soc.* **115**, 105811 (2024).
  25. Oke, T. R. The urban energy balance. *Prog. Phys. Geogr. Earth Environ.* **12**, 471–508 (1988).
  26. Loridan, T. & Grimmond, C. S. B. Characterization of energy flux partitioning in urban environments: Links with surface seasonal properties. *J. Appl. Meteorol. Climatol.* **51**, 219–241 (2012).
  27. Harman, I. N. & Finnigan, J. J. A simple unified theory for flow in the canopy and roughness sublayer. *Boundary-Layer Meteorol.* **123**, 339–363 (2007).
  28. Hersbach, H. *et al.* The ERA5 global reanalysis. *Q. J. R. Meteorol. Soc.* **146**, 1999–2049 (2020).
  29. U.S. Department of Energy. *EnergyPlus™ Version 9.5.0 Documentation Engineering Reference*. (2021).
